# Supplementary material for: Matrix Metalloproteinase‐2 Negatively Regulates Cardiac Secreted Phospholipase A2 to Modulate Inflammation and Fever
Source: PubMed Central journal article supplement — J Am Heart Assoc. 2015 Mar 27;4(4):e001868. doi: 10.1161/JAHA.115.001868 (PMC4579961; doi:10.1161/jaha.115.001868), 2015-03-27
Supplement: jah3-4-e001868-s1.pdf [file jah3-4-e001868-s1.pdf]

# Supplemental material

## **MMP-2 negatively regulates cardiac secreted phospholipase A<sub>2</sub> to modulate inflammation and fever**

Evan Berry, BSc; Samuel Hernandez-Anzaldo, MSc; Farideh Ghomashchi, MSc; Richard Lehner, PhD; Makoto Murakami, PhD; Michael H. Gelb, PhD; Zamaneh Kassiri, PhD; Xiang Wang, PhD; Carlos Fernandez-Patron\*, PhD.

**Affiliations:** Departments of Biochemistry (EB, SH-A, XW, CF-P), Pediatrics (RL), Physiology (ZK), Group on Molecular and Cell Biology of Lipids (RL), Cardiovascular Research Group (ZK, CF-P) and Mazankowski Alberta Heart Institute (ZK, CF-P), Faculty of Medicine and Dentistry, University of Alberta, Edmonton, Alberta, Canada. Department of Chemistry, University of Washington, Seattle, Washington, USA (FG, MHG). Lipid Metabolism Project, Tokyo Metropolitan Institute of Medical Science, 2-1-6 Kamikitazawa, Setagaya-ku, Tokyo 156-8506, Japan; and CREST, Japan Science and Technology Agency, 4-1-8 Honcho, Kawaguchi, Saitama 332-0012, Japan (MM).

(\*): **Corresponding author:** Dr. Carlos Fernandez-Patron, 3-19 Medical Sciences Building, 114 St & 85 Ave, Edmonton, Alberta, T6G 2H7

Phone: +1-(780)-492-9540, E-mail: [cf2@ualberta.ca](mailto:cf2@ualberta.ca)

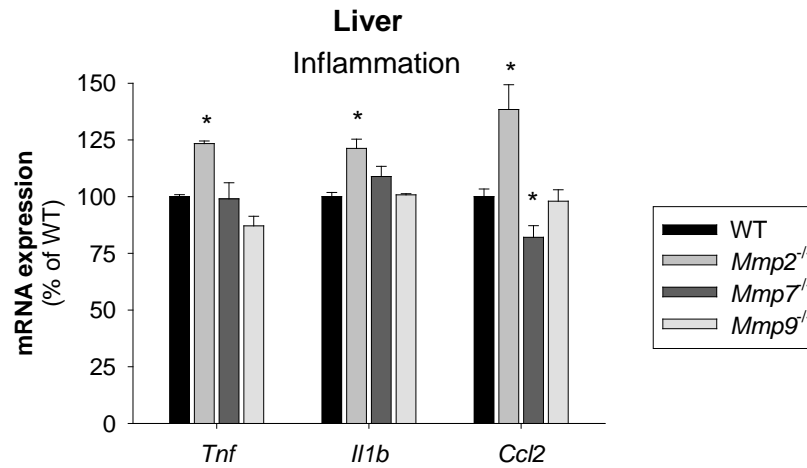**Supplemental Figure S1**

qRT-PCR analysis of selected inflammatory marker genes in the livers of WT, *Mmp2*<sup>-/-</sup>, *Mmp7*<sup>-/-</sup> and *Mmp9*<sup>-/-</sup> mice.  $n=3$  for each genotype. Results are means  $\pm$  sem. \*:  $P \leq 0.05$  vs. WT (control). All pairwise multiple comparisons vs. control group (Holm-Sidak method).

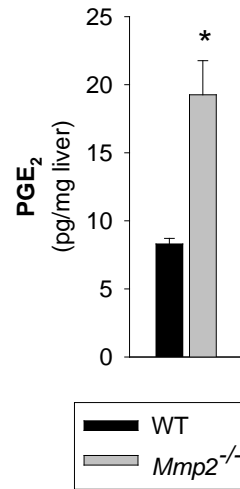**Supplemental Figure S2**

Hepatic PGE<sub>2</sub> levels in mice 5 hours after intraperitoneal LPS (30 μg/kg) administration. Pools of *n*=3 were measured in duplicate. Results are means ± sem. \*: *P* ≤ 0.05 vs. WT. *t*-test.

**A**

| Study group   | Baseline Temperature (C) |
|---------------|--------------------------|
| - Doxycycline | 37.23 ± 0.12             |
| + Doxycycline | 37.23 ± 0.12             |

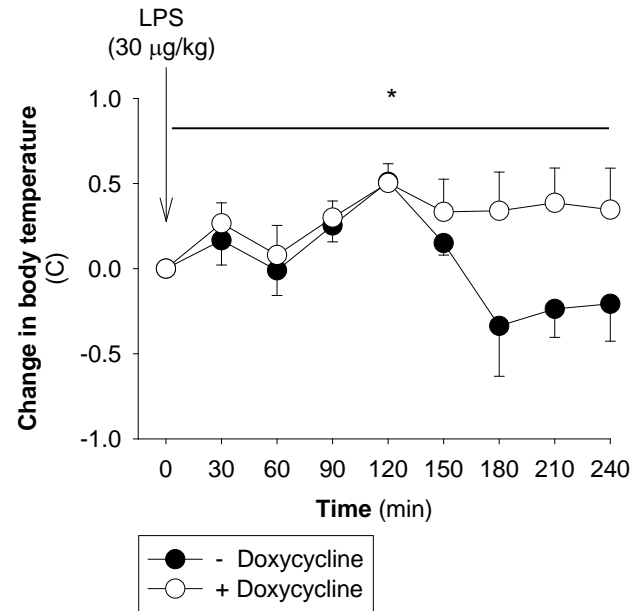**B**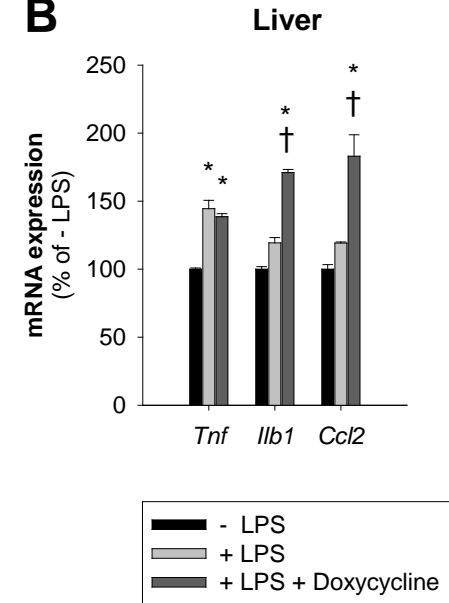**Supplemental Figure S3**

LPS-induced fever response in mice administered the MMP inhibitor, doxycycline. This experiment was conducted in parallel with that indicated in Figure 8A.  $n=3$ . Doxycycline-treated mice received doxycycline (50 mg/kg/day) orally for two days, with the second dose immediately preceding injection of LPS.

(A) Body temperature was measured rectally before and after intraperitoneal injection of LPS. \*:  $P \leq 0.05$  vs. - Doxycycline. One way repeated measures ANOVA.

(B) Augmentation of selected hepatic inflammatory marker genes by doxycycline in mice administered LPS. qRT-PCR analysis of livers 5 hours after LPS (30 µg/kg) administration. \*:  $P \leq 0.05$  vs. - LPS. †  $P \leq 0.05$  vs. + LPS. All pairwise multiple comparisons vs. control group (Holm-Sidak method).

MMP-2 inhibits systemic sPLA<sub>2</sub>

Corresponding author: Carlos Fernandez-Patron

**A**

| Study group | Baseline Temperature (C) |
|-------------|--------------------------|
| AdGFP       | 37.33 ± 0.05             |
| AdMMP-2     | 37.53 ± 0.04             |

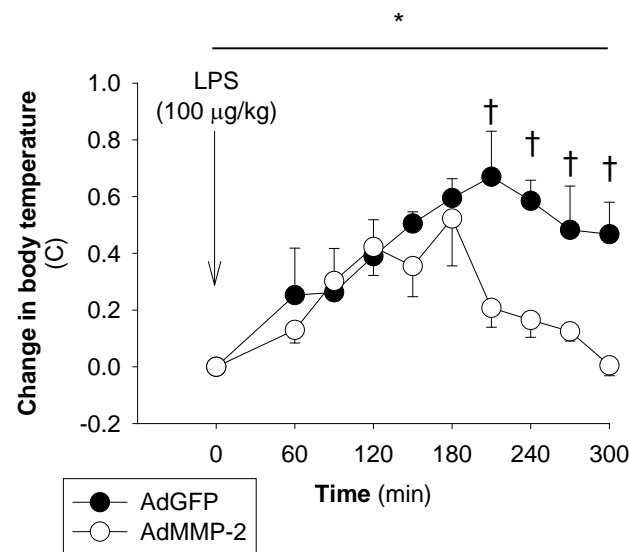**B**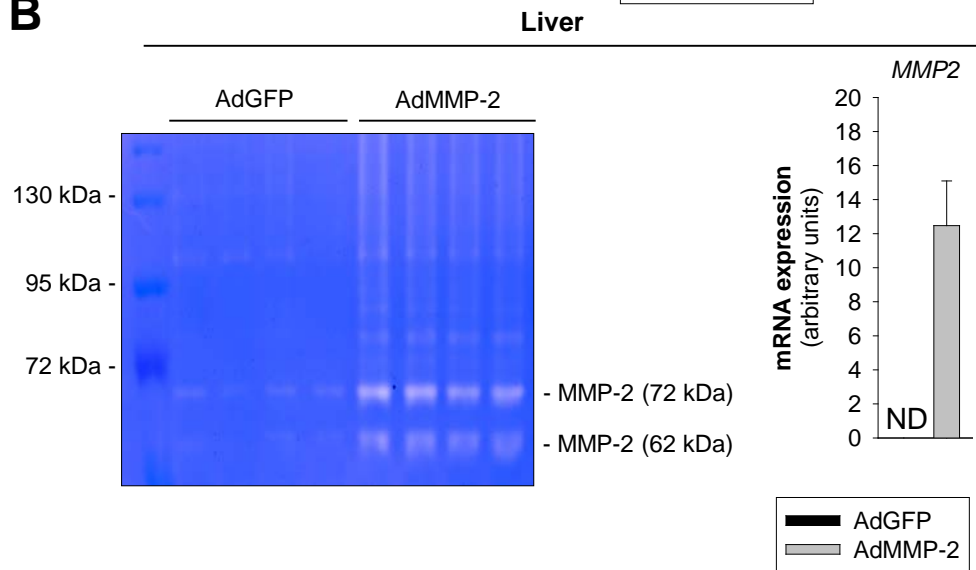**C**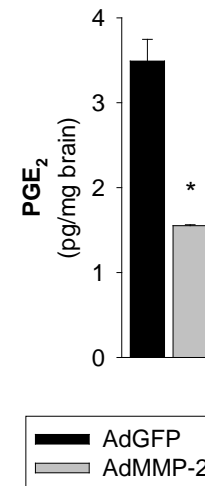

**Supplemental Figure S4** (A) LPS-induced fever response of mice that overexpress MMP-2. WT mice received an intraperitoneal injection of AdMMP-2 or AdGFP (~10<sup>8</sup> pfu). Three days later the mice received an intraperitoneal injection of LPS (100 µg/kg). Body temperature was measured rectally before and after LPS. n=4. \*: P≤0.05 vs. AdGFP. Friedman Repeated Measures Analysis of Variance on Ranks. †: P≤0.05 vs. AdGFP at indicated times. All pairwise multiple comparison procedures (Fisher LSD Method). (B) Confirmation of MMP-2 overexpression. MMP-2 expression in AdMMP-2 vs. AdGFP infected mice 5 hours after LPS (100 µg/kg) administration. Left: Gelatin zymography. Right: qRT-PCR. ND: not detected. n=4. (C) Hypothalamic PGE<sub>2</sub> levels 5 hours after LPS (100 µg/kg). Pools of n=4 were measured in duplicate. \*: P≤0.05 vs. AdGFP. t-test.
